# Supplementary material for: A Single Catalyst for Promoting Reverse Processes: Synthesis and Chemical Degradation of Polylactide
Source: PubMed Central journal article supplement (PMC9298063; doi:10.1002/cssc.202101518), 2021-11-02
Supplement: CSSC-14-5470-s001.pdf [file CSSC-14-5470-s001.pdf]

# ChemSusChem

## Supporting Information

### **A Single Catalyst for Promoting Reverse Processes: Synthesis and Chemical Degradation of Polylactide**

Federica Santulli, Marina Lamberti, and Mina Mazzeo\*© 2021 The Authors. ChemSusChem published by Wiley-VCH GmbH. This is an open access article under the terms of the Creative Commons Attribution License, which permits use, distribution and reproduction in any medium, provided the original work is properly cited.

## Experimental section

|                                                                                                                                                                                                                                                                                                                         |    |
|-------------------------------------------------------------------------------------------------------------------------------------------------------------------------------------------------------------------------------------------------------------------------------------------------------------------------|----|
| <b>Figure S1.</b> $^1\text{H}$ NMR spectrum (400 MHz, $\text{C}_6\text{D}_6$ , 298 K) of ligand <i>L1</i> .....                                                                                                                                                                                                         | 2  |
| <b>Figure S2.</b> $^1\text{H}$ NMR spectrum (400 MHz, $\text{C}_6\text{D}_6$ , 298 K) of complex <b>1</b> . ....                                                                                                                                                                                                        | 3  |
| <b>Figure S3.</b> $^{13}\text{C}$ NMR spectrum (100 MHz, $\text{C}_6\text{D}_6$ , 298 K) of complex <b>1</b> . ....                                                                                                                                                                                                     | 4  |
| <b>Figure S4.</b> Aromatic region of COSY NMR spectrum (400 MHz, $\text{C}_6\text{D}_6$ , 298 K) of complex <b>1</b> . ....                                                                                                                                                                                             | 4  |
| <b>Figure S5.</b> NOESY NMR spectrum (600 MHz, $\text{C}_6\text{D}_6$ , 298 K) of complex <b>1</b> .....                                                                                                                                                                                                                | 5  |
| <b>Figure S6.</b> Aromatic region of HSQC NMR spectrum (600 MHz, $\text{C}_6\text{D}_6$ , 298 K) of complex <b>1</b> .....                                                                                                                                                                                              | 5  |
| <b>Figure S7.</b> Aliphatic region of HSQC NMR spectrum (600 MHz, $\text{C}_6\text{D}_6$ , 298 K) of complex <b>1</b> . ....                                                                                                                                                                                            | 6  |
| <b>Figure S8.</b> DOSY NMR spectrum (400 MHz, $\text{C}_6\text{D}_6$ , 298 K) of complex <b>1</b> ( $D = 7.73 \cdot 10^{-10} \text{ m}^2/\text{s}$ ) in the presence of tetrakis(trimethylsilyl)silane TMSS as standard ( $D = 9.59 \cdot 10^{-10} \text{ m}^2/\text{s}$ ). ....                                        | 6  |
| <b>Figure S9.</b> $^1\text{H}$ NMR spectrum (400 MHz, $\text{CD}_2\text{Cl}_2$ , 298 K) of complex <b>1</b> .....                                                                                                                                                                                                       | 7  |
| <b>Figure S10.</b> $^{13}\text{C}$ NMR spectrum (400 MHz, $\text{CD}_2\text{Cl}_2$ , 298 K) of complex <b>1</b> .....                                                                                                                                                                                                   | 8  |
| <b>Figure S11.</b> Aromatic region of COSY NMR spectrum (400 MHz, $\text{CD}_2\text{Cl}_2$ , 298 K) of complex <b>1</b> .....                                                                                                                                                                                           | 8  |
| <b>Figure S12.</b> TGA measurement of the complex <b>1</b> at 150°C.....                                                                                                                                                                                                                                                | 9  |
| <b>Figure S13.</b> MALDI-TOF of P(Lrac-LA) sample run 2 Table 1. ....                                                                                                                                                                                                                                                   | 11 |
| <b>Figure S14.</b> MALDI-TOF of P(L-LA) sample run 11 Table 1.....                                                                                                                                                                                                                                                      | 10 |
| <b>Figure S15.</b> Methine region of the homonuclear decoupled $^1\text{H}$ NMR spectrum ( $\text{CDCl}_3$ , RT, 400MHz) of a P(arc-LA) sample.....                                                                                                                                                                     | 13 |
| <b>Figure S16.</b> GPC analysis of sample 12 Table 1. ....                                                                                                                                                                                                                                                              | 11 |
| <b>Figure S17.</b> Methine region of the homonuclear decoupled $^1\text{H}$ NMR spectrum ( $\text{CDCl}_3$ , RT, 400MHz) of a P(L-LA) sample run 12 Table 1. ....                                                                                                                                                       | 12 |
| <b>Figure S18.</b> Methine region of the homonuclear decoupled $^1\text{H}$ NMR spectrum ( $\text{CDCl}_3$ , RT, 400MHz) of a P(D,L-LA) sample run 2 Table 1. ....                                                                                                                                                      | 13 |
| <b>Figure S19.</b> DSC measurement of a P(L-LA) sample run 10 Table 1. ....                                                                                                                                                                                                                                             | 14 |
| <b>Table S1.</b> Polymerization of lactides promoted by <b>1</b> . <sup>a</sup> .....                                                                                                                                                                                                                                   | 14 |
| <b>Table S2.</b> Number average molecular weight ( $M_n$ ), dispersity ( $\mathcal{D}$ ) and $T_f$ of PLA samples used for depolymerization reactions.....                                                                                                                                                              | 15 |
| <b>Figure S20.</b> $^1\text{H}$ NMR spectrum (600 MHz, $\text{CD}_2\text{Cl}_2$ , 298 K) depolymerized PLLA. ....                                                                                                                                                                                                       | 16 |
| <b>Figure S21.</b> Kinetic profile for degradation of a poly(D,L) lactide sample ( $[\text{PLA}]_0 = 0.44 \text{ M}$ ; [polyester linkages] $_0$ /[Zn] $_0 = 60$ ; $\text{CH}_2\text{Cl}_2$ (0.45 mL) as solvent; MeOH 0.05mL).....                                                                                     | 16 |
| <b>Figure S22.</b> Pseudofirst-order kinetic plot for degradation of poly(rac) lactide ( $[\text{PLA}]_0 = 0.44 \text{ M}$ ; [polyester linkages] $_0$ /[Zn] $_0 = 60$ ; $\text{CH}_2\text{Cl}_2$ (0.45 mL) as solvent; MeOH 0.05mL). Pseudofirst-order rate is = $1.50 \text{ h}^{-1}$ at 25°C ( $R^2 = 0.9962$ )..... | 17 |
| <b>Figure S23.</b> $^1\text{H}$ NMR spectrum (400 MHz, $\text{CDCl}_3$ , 298 K) of methyl-lactide (Me-La). ....                                                                                                                                                                                                         | 18 |
| <b>Figure S24.</b> $^1\text{H}$ NMR spectrum (400 MHz, $\text{C}_6\text{D}_6$ , 298 K) of ethyl-lactide (Et-La). ....                                                                                                                                                                                                   | 19 |
| <b>Table S3.</b> Methanolysis of PLAs performed in THF solution. <sup>a</sup> .....                                                                                                                                                                                                                                     | 20 |

## Synthesis and characterization of the ligand L1

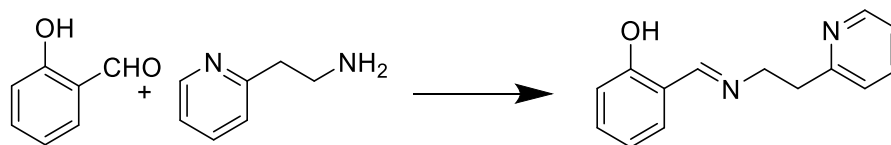

**Scheme1.** Synthesis of ligand L1.

The ligand was synthesized by condensation of the 2-(2-pyridyl) ethylamine (660 mg, 5.40 mmol) with the salicyl aldehyde (660 mg, 5.40 mmol). The reaction was performed in reflux of ethanol (40 mL) overnight. The solvent was removed under vacuum, forming an orange oil in **high** yields (81%).

The success of performed reaction was confirmed by  $^1\text{H}$  NMR experiment, which spectrum is illustrated in the following figure:

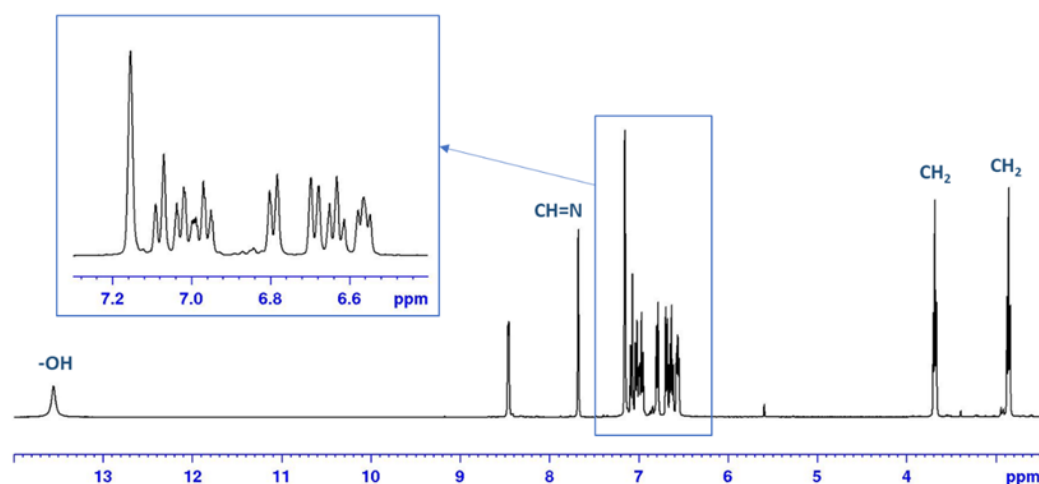

**Figure S1.**  $^1\text{H}$  NMR spectrum (400 MHz,  $\text{C}_6\text{D}_6$ , 298 K) of ligand L1.

$^1\text{H}$  NMR (400 MHz,  $\text{C}_6\text{D}_6$ , 298 K):  $\delta$  13.6 (s, 1H, -OH), 8.46 (d,  $J = 4.1\text{Hz}$ , 1H, Py-H), 7.67 (s, 1H, CH=N), 7.08 (d,  $J = 8.2\text{Hz}$ , 1H, Ph-H), 7.02 (dt,  $J_1 = 7.2\text{Hz}$ ,  $J_2 = 1.5\text{Hz}$ , 1H, Ph-H), 6.96 (dt,  $J_1 = 7.5\text{Hz}$ ,  $J_2 = 1.7\text{Hz}$ , 1H, Py-H), 6.79 (d,  $J = 7.6\text{Hz}$ , 1H, Ph-H), 6.69 (d,  $J = 7.6\text{Hz}$ , 1H, Py-H), 6.63 (dt,  $J_1 = 7.2\text{Hz}$ ,  $J_2 = 1.1\text{Hz}$ , 1H, Ph-H), 6.56 (d,  $J = 7.2\text{Hz}$ , 1H, Py-H), 3.68 (t,  $J = 6.9\text{Hz}$ , 2H,  $\text{CH}_2$ ), 2.86 (t,  $J = 6.9\text{Hz}$ , 2H,  $\text{CH}_2$ ).

## Synthesis and characterization of the complex 1

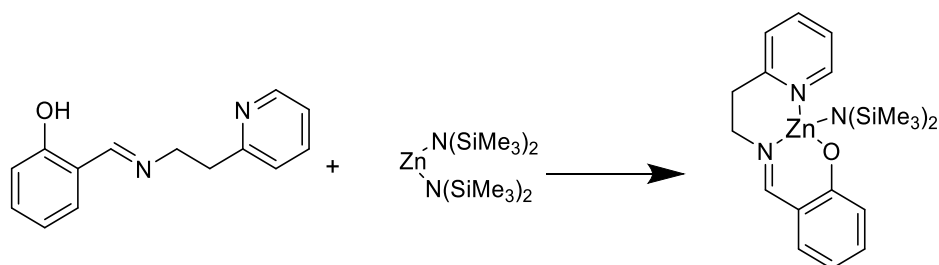

**Scheme 2.** Synthesis of complex 1.

To a stirred solution containing Zinc bis[bis(trimethylsilyl)amide] (773 mg, 2.0 mmol) in dry benzene (4.0mL) was added dropwise a solution of the ligand precursor L1 (453 mg, 2.0 mmol) in dry benzene (2.0mL). The solution was stirred for 3h at room temperature. The solvent was removed under vacuum, forming a red solid. Yield: 80%. The formation of the desired species was confirmed by NMR and elemental analysis. Elemental Analysis calculated for: C<sub>20</sub>H<sub>31</sub>N<sub>3</sub>O<sub>Si</sub><sub>2</sub>Zn (%): C, 53.26; H, 6.93; N, 9.32; Found: C, 52.98; H, 7.02; N, 9.47.

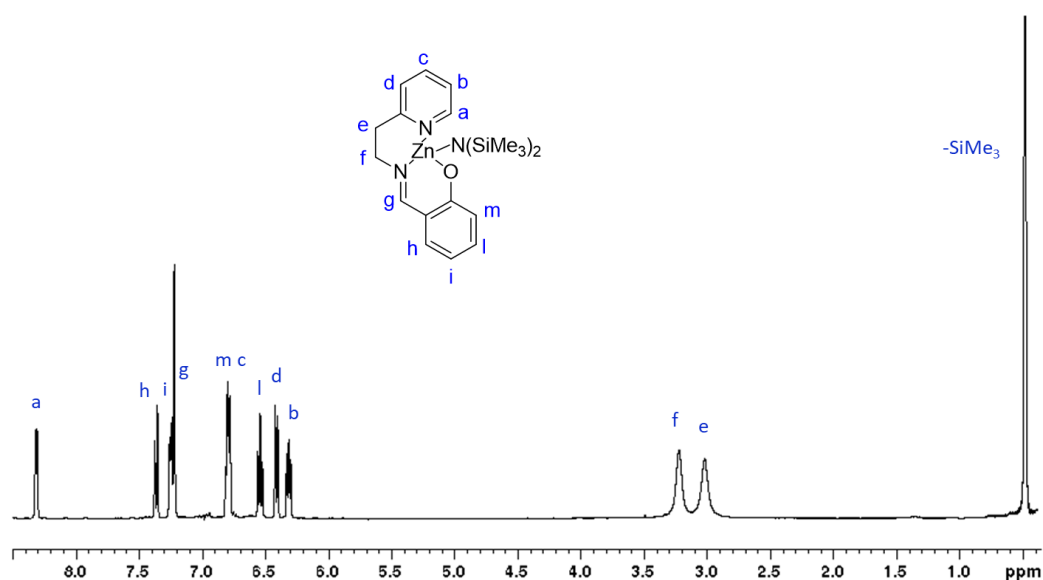

**Figure S2.** <sup>1</sup>H NMR spectrum (400 MHz, C<sub>6</sub>D<sub>6</sub>, 298 K) of complex 1.

<sup>1</sup>H NMR (400 MHz, C<sub>6</sub>D<sub>6</sub>, 298 K): δ 8.31 (d, J = 5.2Hz, 1H, Ha), 7.36 (d, J = 8.6Hz, 1H, Hh), 7.25 (m, 1H, Hi), 7.22 (s, 1H, Hg), 6.80 (m, 2H, Hm-Hc), 6.53 (t, J = 7.8Hz, 1H, Hl), 6.40 (d, J = 7.8Hz, 1H, Hd), 6.31 (t, J = 6.5Hz, 1H, Hb), 3.22 (m, 2H, Hf), 3.01 (m, 2H, He), 0.47 (s, 18H, -SiMe<sub>3</sub>).

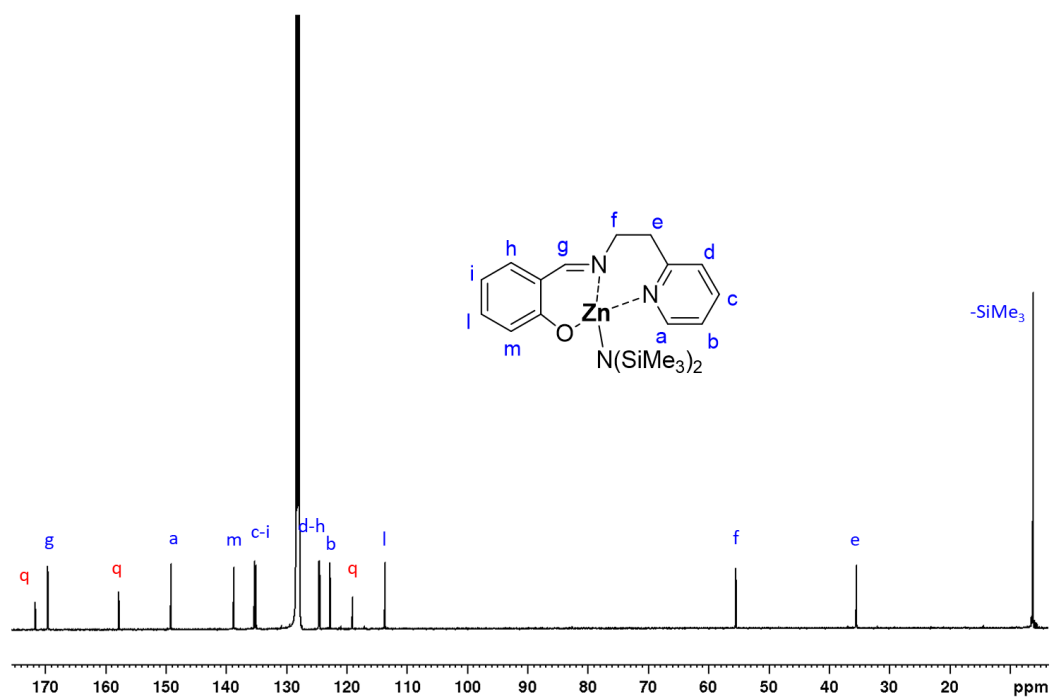

**Figure S3.**  $^{13}\text{C}$  NMR spectrum (100 MHz,  $\text{C}_6\text{D}_6$ , 298 K) of complex **1**.

$^{13}\text{C}$  NMR (100 MHz,  $\text{C}_6\text{D}_6$ , 298 K):  $\delta$  171.6 (Cq), 169.5 (Cg), 157.8 (Cq), 149.1 (Ca), 138.7 (Cm), 135.2 (Cc), 135.0 (Ci), 124.6 (Cd), 124.4 (Ch), 122.8 (Cb), 119.0 (Cq), 113.6 (Cl), 55.4 (Cf), 35.4 (Ce), 6.12 (-SiMe<sub>3</sub>). Cq means quaternary carbon.

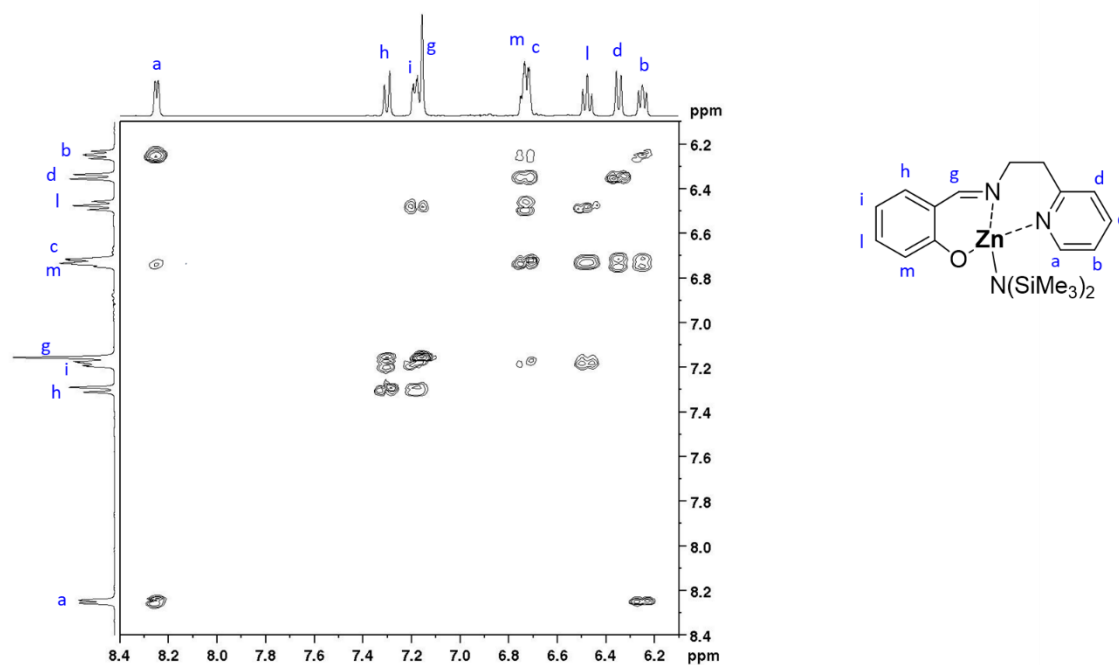

**Figure S4.** Aromatic region of COSY NMR spectrum (400 MHz,  $\text{C}_6\text{D}_6$ , 298 K) of complex **1**.

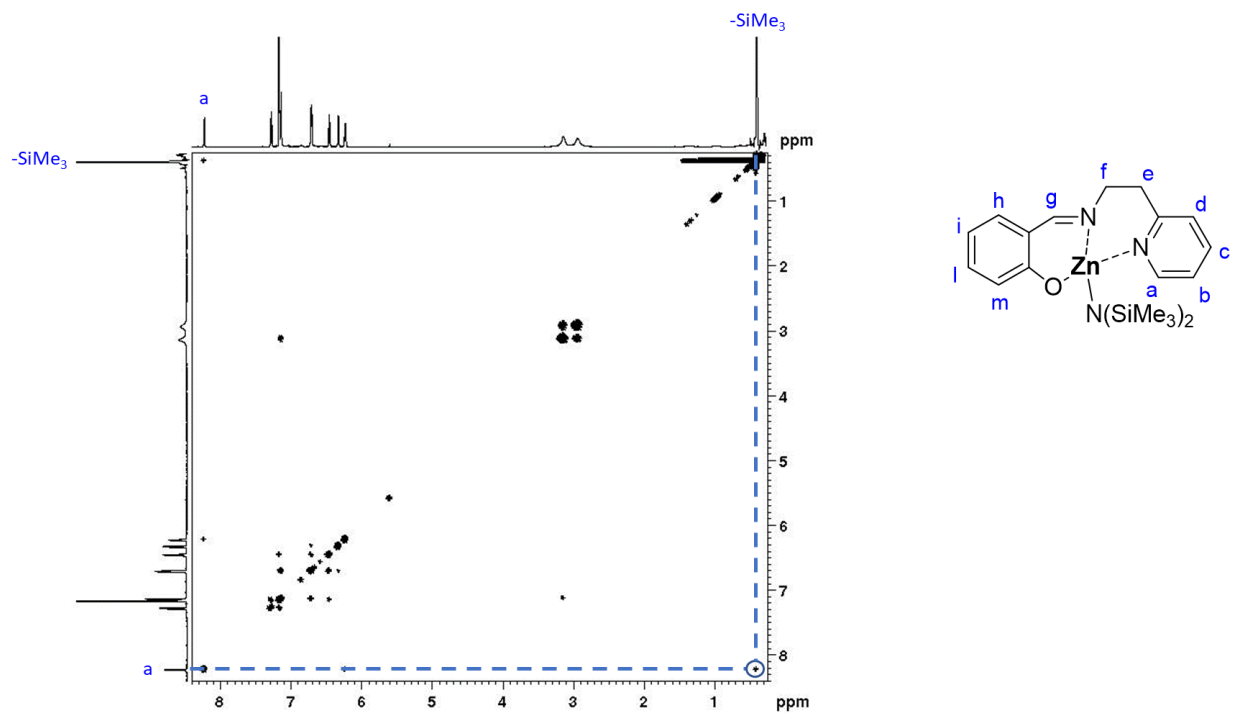

**Figure S5.** NOESY NMR spectrum (600 MHz, C<sub>6</sub>D<sub>6</sub>, 298 K) of complex 1.

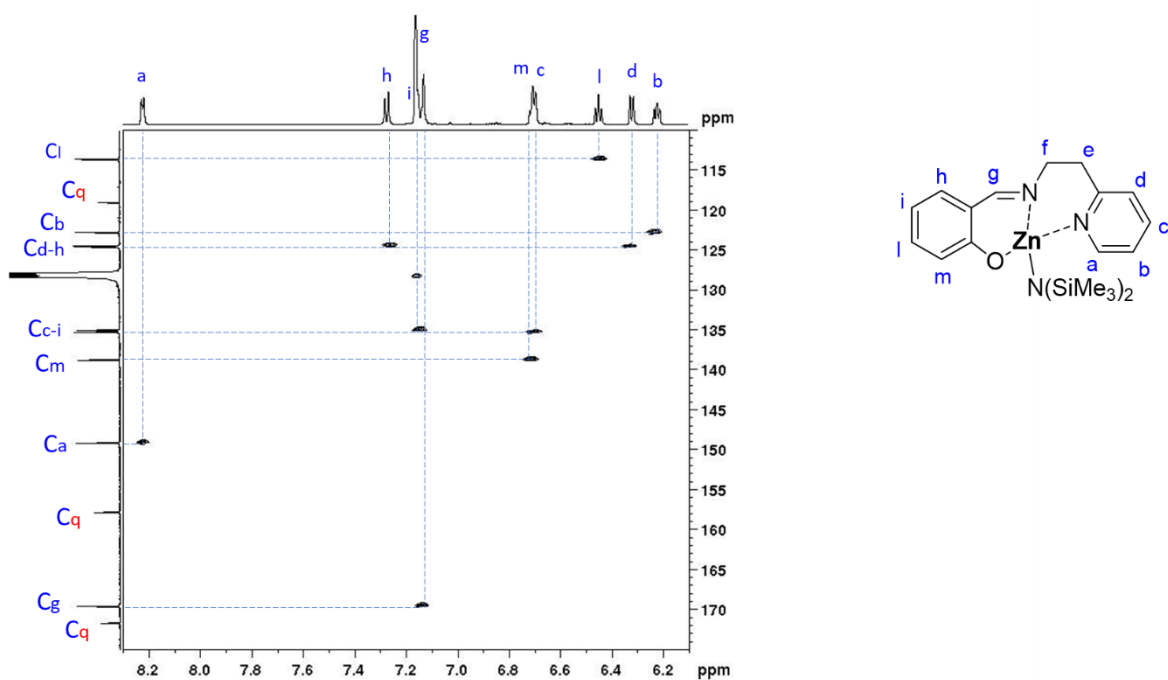

**Figure S6.** Aromatic region of HSQC NMR spectrum (600 MHz, C<sub>6</sub>D<sub>6</sub>, 298 K) of complex 1.

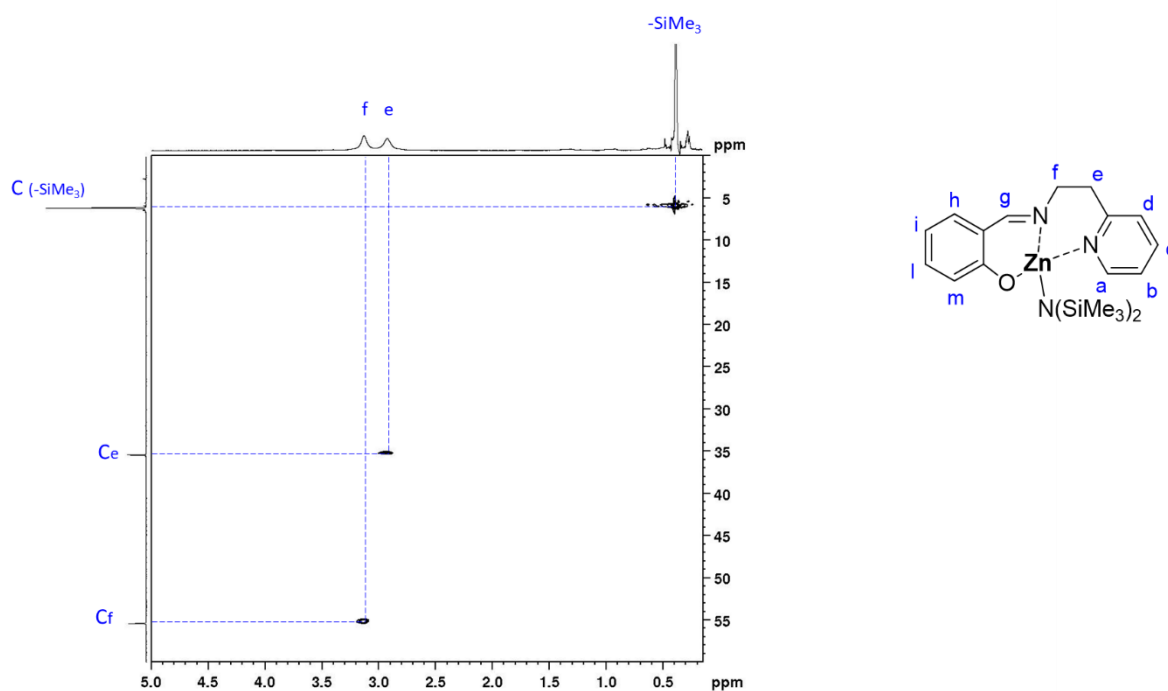

**Figure S7.** Aliphatic region of HSQC NMR spectrum (600 MHz, C<sub>6</sub>D<sub>6</sub>, 298 K) of complex **1**.

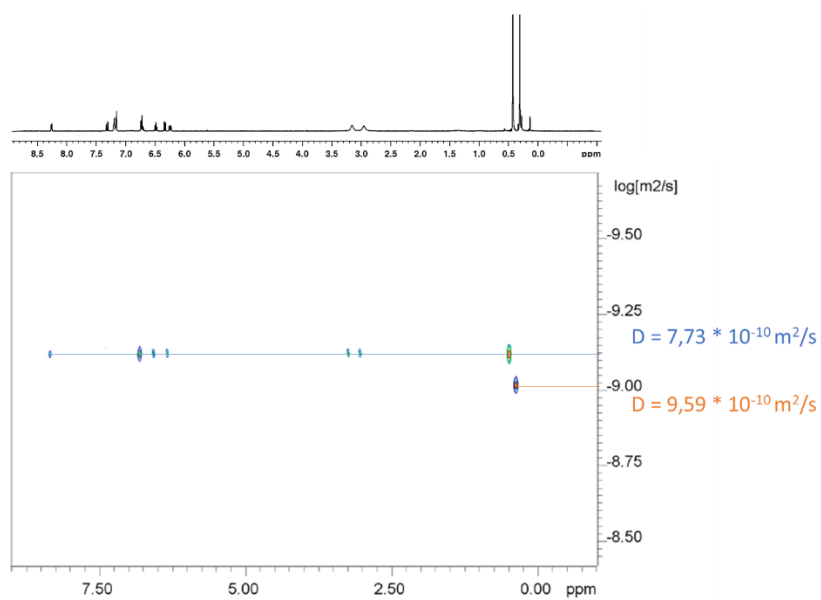

**Figure S8.** DOSY NMR spectrum (400 MHz, C<sub>6</sub>D<sub>6</sub>, 298 K) of complex **1** ( $D = 7.73 \cdot 10^{-10} \text{ m}^2/\text{s}$ ) in the presence of tetrakis(trimethylsilyl)silane TMSS as standard ( $D = 9.59 \cdot 10^{-10} \text{ m}^2/\text{s}$ ).

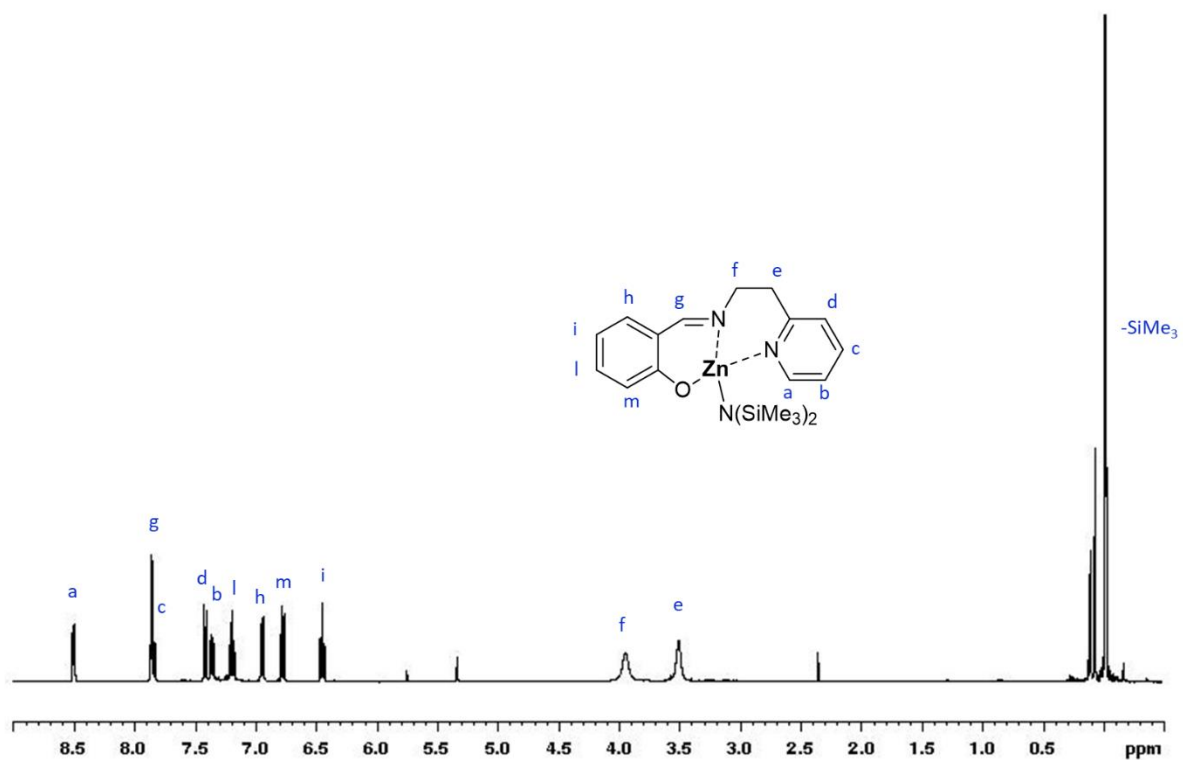

**Figure S9.** <sup>1</sup>H NMR spectrum (400 MHz, CD<sub>2</sub>Cl<sub>2</sub>, 298 K) of complex **1**.

<sup>1</sup>H NMR (400 MHz, CD<sub>2</sub>Cl<sub>2</sub>, 298 K):  $\delta$  8.49 (d,  $J = 5.2$  Hz, 1H, H<sub>a</sub>), 7.84 (m, 2H, H<sub>g-c</sub>), 7.41 (d,  $J = 7.8$  Hz, 1H, H<sub>d</sub>), 7.35 (t,  $J = 6.5$  Hz, 1H, H<sub>b</sub>), 7.18 (t,  $J = 8.7$  Hz, 1H, H<sub>l</sub>), 6.94 (dd,  $J_1 = 7.8$  Hz,  $J_2 = 1.7$  Hz, 1H, H<sub>h</sub>), 6.76 (d,  $J = 8.6$  Hz, 1H, H<sub>m</sub>), 6.44 (t,  $J = 7.8$  Hz, 1H, H<sub>i</sub>), 3.93 (m, 2H, H<sub>f</sub>), 3.49 (m, 2H, H<sub>e</sub>), -0.0336 (s, 18H, -SiMe<sub>3</sub>).



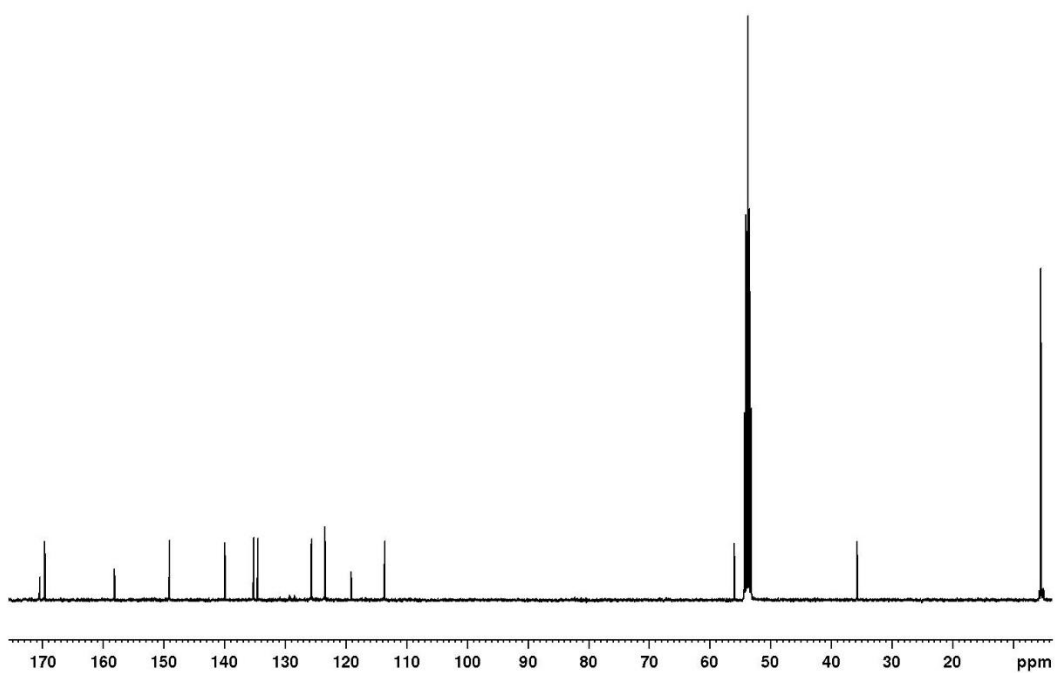

**Figure S10.**  $^{13}\text{C}$  NMR spectrum (400 MHz,  $\text{CD}_2\text{Cl}_2$ , 298 K) of complex **1**.  
 $^{13}\text{C}$  NMR (100 MHz,  $\text{CD}_2\text{Cl}_2$ , 298 K):  $\delta$  170.4, 169.6, 158.1, 149.0, 139.9, 135.1, 134.5, 125.6, 123.4, 123.3, 119.1, 113.6, 55.9, 35.7, 5.40.

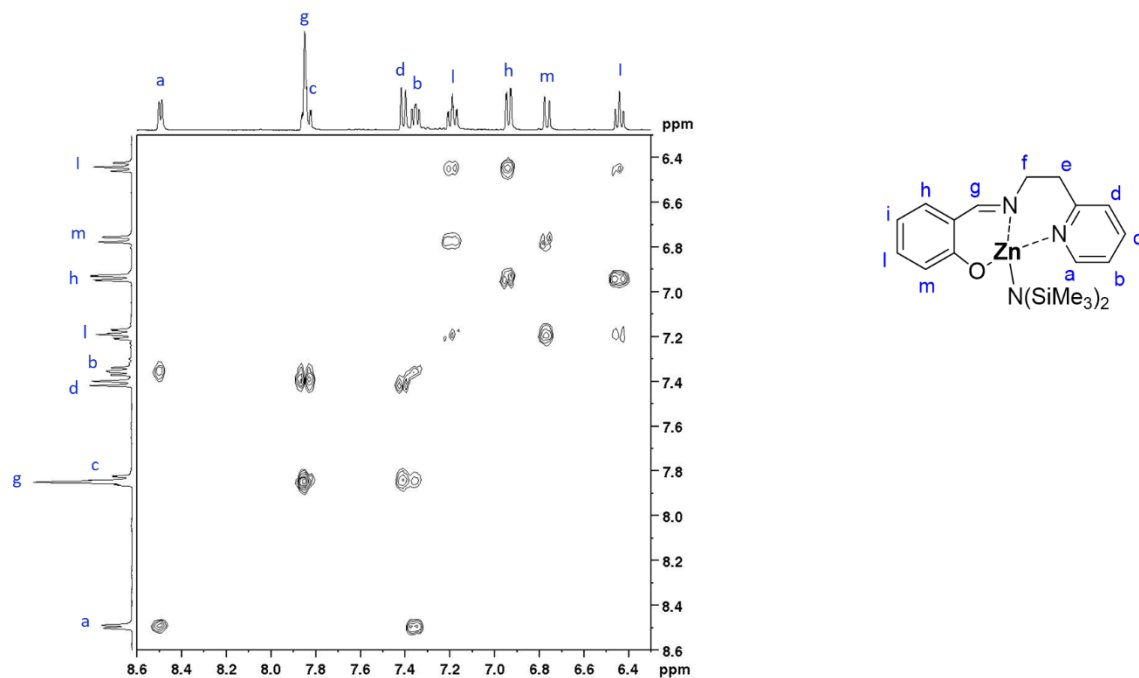

**Figure S11.** Aromatic region of COSY NMR spectrum (400 MHz,  $\text{CD}_2\text{Cl}_2$ , 298 K) of complex **1**.

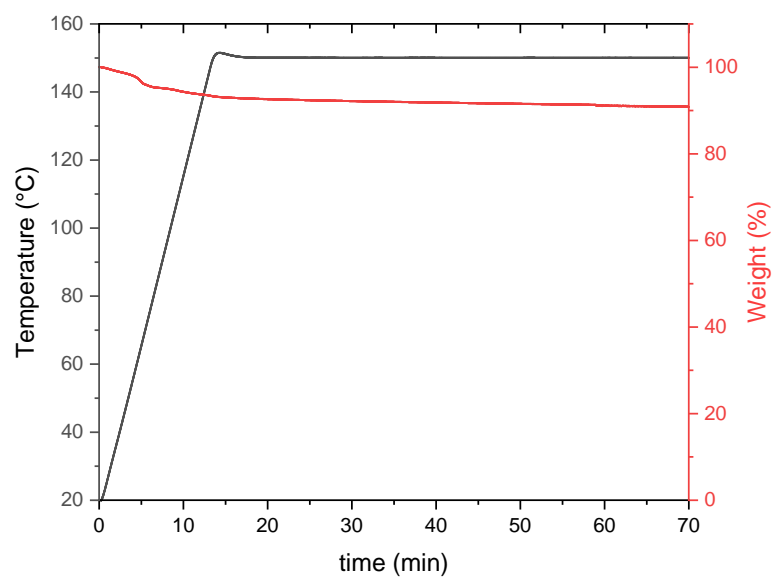

**Figure S12.** TGA measurement of the complex **1** at 150°C.



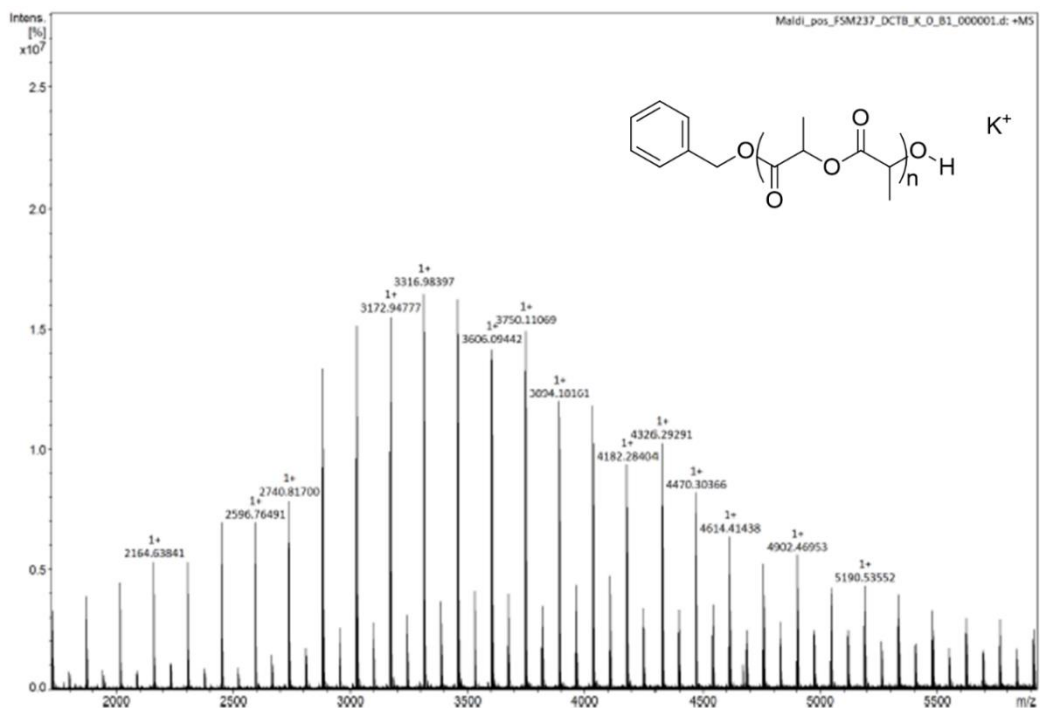

Figure S14. MALDI-TOF of P(L-LA) sample run 11 Table 1.

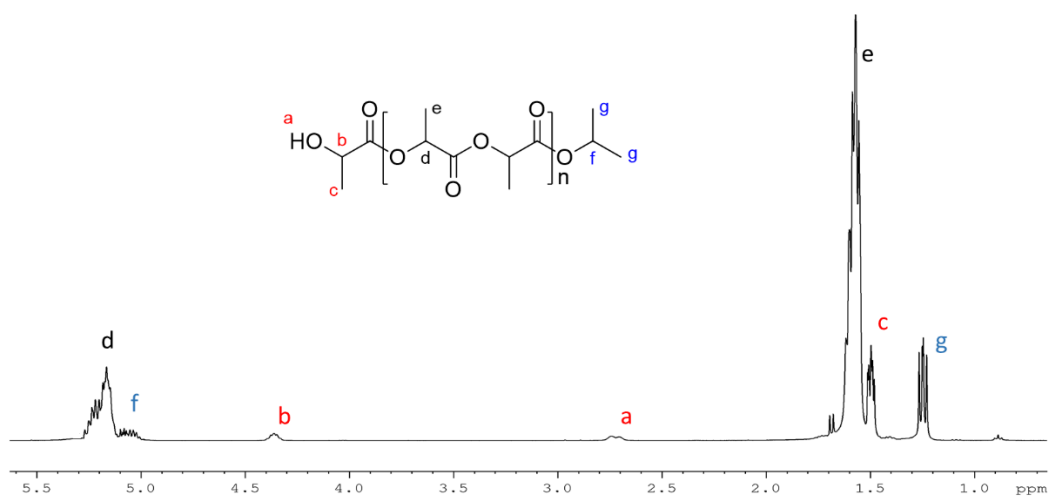

Figure S15.  $^1\text{H}$  NMR spectrum (400 MHz,  $\text{CDCl}_3$ , 298 K) of a P(rac-LA) sample Table S1.

Istituto di Scienze e Tecnologie Chimiche "Giulio Natta" (SCTIEC CNR)

Laboratorio di Caratterizzazione Molecolare

Tel: 02-23699.384

Fax: 02-23.62.946

e-mail: cnrlab@ismc.cnr.it

Software: Empower Software  
Report Method: GPCRel\_Results

Sample Name: Losio\_FSM22

Printed: 28/05/2021

Page: 1 of 2

INJECTION INFORMATION

Project Name: SEC\_THF\_2021

Sample Name: Losio\_FSM22

AcqMethod: Default600

Date Acquired: 27/05/2021 21:02:45

Channel: 410

Vial: 8

Sample Type: Broad Unknown

Processing Method: PS\_Relativ\_Mig21

Date Processed: 28/05/2021 9:58:17

Injection Volume: 150.00 µl

Injection: 1

Run Time: 60.00 Minutes

SYSTEM INFORMATION

System: W600+W717+PDA996+DR1410;THF;Stab; 0.6;35°C;Deg

Columns: 3PL (Poli, Cligo, 50A.5 µm)

SAMPLE DESCRIPTION: Losio PLA comp FSM22

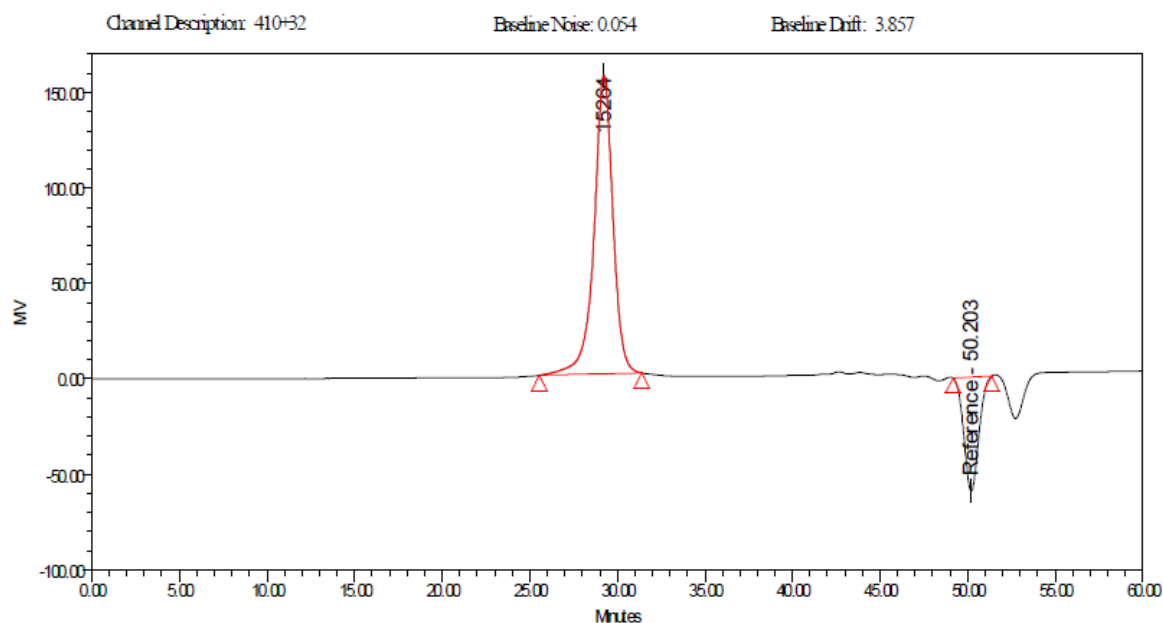

Peak Results

|   | RT     | Area     | %Area | Height | %Height | Int Type | Signal/Noise |
|---|--------|----------|-------|--------|---------|----------|--------------|
| 1 | 29.226 | 11755690 | 78.07 | 156475 | 72.38   | tb       | 2885.942     |
| 2 | 50.203 | 3301748  | 21.93 | -59716 | 27.62   | tb       | 1101.364     |

GPC Relative Calibration Results

|   | Ret Time | Mp    | Mh    | Mw    | Mz    | Mw/Mh | Mz/Mw |
|---|----------|-------|-------|-------|-------|-------|-------|
| 1 | 29.226   | 15264 | 15046 | 17857 | 25757 | 1.19  | 1.44  |
| 2 | 50.203   |       |       |       |       |       |       |

Figure S16. GPC analysis of sample 12 Table 1.

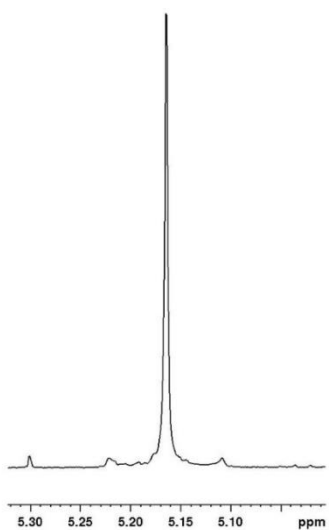

**Figure S17.** Methine region of the homonuclear decoupled  $^1\text{H}$  NMR spectrum ( $\text{CDCl}_3$ , RT, 400MHz) of a P(L-LA) sample run 12 Table 1.

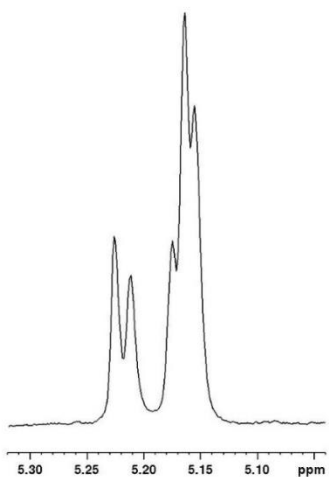

**Figure S18.** Methine region of the homonuclear decoupled  $^1\text{H}$  NMR spectrum ( $\text{CDCl}_3$ , RT, 400MHz) of a P(D,L-LA) sample run 2 Table 1.

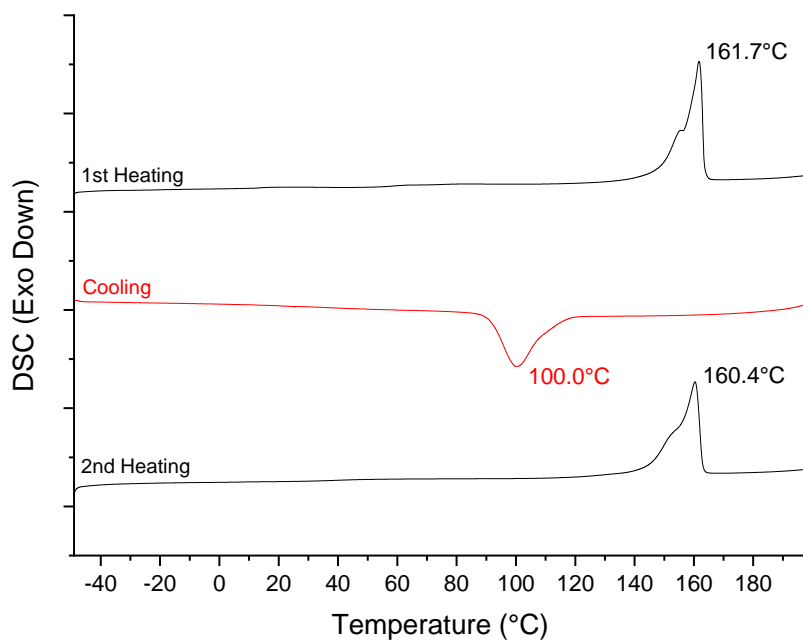

**Figure S19.** DSC measurement of a P(L-LA) sample run 10 Table 1.

**Table S1.** Polymerization of lactides promoted by 1.<sup>a</sup>

| Run             | Mon    | [LA]/[Zn]/[ROH] | T<br>(°C) | Time<br>(min) | Conv<br>(%) | TOF<br>(h <sup>-1</sup> ) |
|-----------------|--------|-----------------|-----------|---------------|-------------|---------------------------|
| 1               | rac-LA | 100/1/0         | 25        | 8             | 61          | 457                       |
| 2               | rac-LA | 100/1/1         | 25        | 0.5           | 22          | 2640                      |
| 3               | rac-LA | 400/1/1         | 25        | 0.5           | 59          | 28320                     |
| 4               | L-LA   | 400/1/1         | 25        | 0.5           | 54          | 25920                     |
| 5               | L-LA   | 400/1/40        | 25        | 0.5           | 31          | 14880                     |
| 6               | L-LA   | 400/1/100       | 25        | 2             | 67          | 8040                      |
| 7 <sup>d</sup>  | L-LA   | 1000/1/2        | 25        | 2             | 56          | 16800                     |
| 8 <sup>e</sup>  | L-LA   | 1000/1/2        | 25        | 2             | 68          | 20400                     |
| 9 <sup>f</sup>  | L-LA   | 1000/1/0        | 150       | 4             | 23          | 3450                      |
| 10 <sup>f</sup> | L-LA   | 1000/1/10       | 150       | 1             | 100         | 60000                     |
| 11 <sup>f</sup> | L-LA   | 1000/1/50       | 150       | 0.5           | 100         | 120000                    |
| 12 <sup>f</sup> | L-LA   | 5000/1/50       | 150       | 5             | 82          | 49200                     |
| 13 <sup>e</sup> | L-LA   | 400/1/1         | 25        | 0.5           | 0.5         | 12000                     |

<sup>a</sup>All reactions were carried out by using 10  $\mu\text{mol}$  of Zn catalyst at 25 °C in  $\text{CH}_2\text{Cl}_2$  (2 mL), ROH was <sup>i</sup>PrOH for runs at 25 °C and BzOH for runs at 150 °C. <sup>b</sup>Experimental  $M_n$  (corrected using factor of 0.58) and  $\mathcal{D}$  values were determined by GPC analysis in THF using polystyrene standards. <sup>c</sup>Calculated  $M^{\text{th}}$ (KDa) =144.14 x ([LA]/[ROH]) x conversion of LA. <sup>d</sup>LA purified by a single crystallization <sup>e</sup> unpurified LA. <sup>f</sup>technical grade purity LA, solvent free. <sup>e</sup> Reaction performed in THF.

### General procedure for the depolymerization of polylactide in solution

The depolymerization reaction was carried out under an inert atmosphere. In a Braun Labmaster glovebox, a magnetically stirred reactor vessel (10 mL) was charged with polylactide and MeOH. In a vial (4mL) the metal-complex was dissolved in THF and added to the polymer. The reaction mixture was stirred at room temperature. At desired times, small aliquots of the reaction mixture were sampled, dissolved in  $\text{CDCl}_3$  or  $\text{CD}_2\text{Cl}_2$  and analyzed by  $^1\text{H}$  NMR spectroscopy. At the end of the depolymerization the reaction was stopped with  $\text{CH}_2\text{Cl}_2$  and dried under vacuum.

| PLA sample       | $M_n$<br>(KDa) | $\mathcal{D}$ | $T_f$ (°C) |
|------------------|----------------|---------------|------------|
| P(L-LA) 1        | 160            | 1.2           | 179        |
| P(D,L-LA)        | 13             | 1.1           |            |
| P(L-LA )2        | 30             | 1.1           | 171        |
| P(L-LA )3        | 48             | 1.8           | 170        |
| P(L-LA )4        | 92             | 1.5           | 178        |
| P(L-LA ) cup     | 58             | 1.9           | 150        |
| P(L-LA )filament | 20             | 2.9           | 168        |

**Table S2.** Number average molecular weight ( $M_n$ ), dispersity ( $\mathcal{D}$ ) and  $T_f$  of PLA samples used for depolymerization reactions.



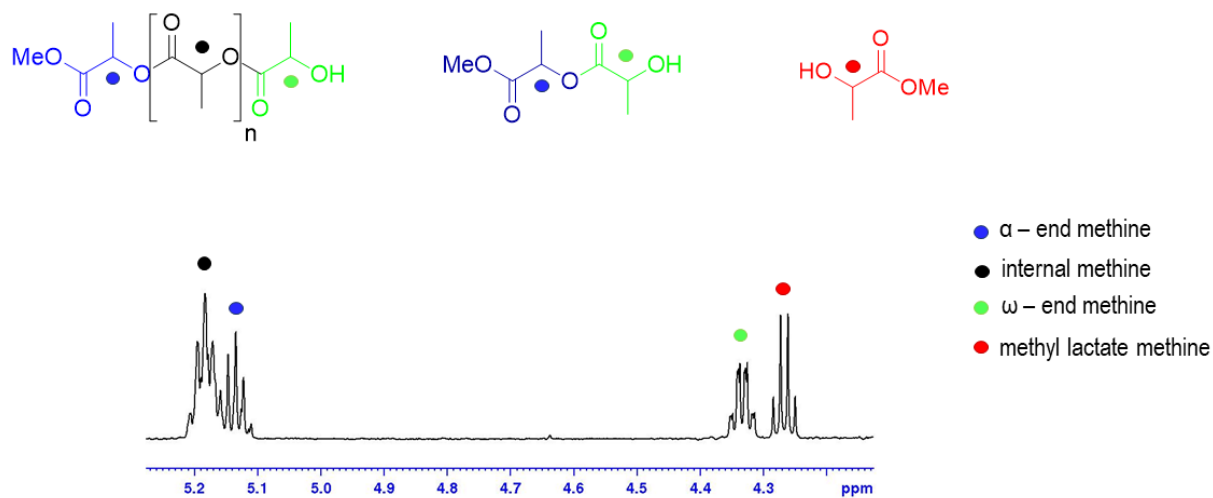

**Figure S20.**  $^1\text{H}$  NMR spectrum (600 MHz,  $\text{CD}_2\text{Cl}_2$ , 298 K) depolymerized PLLA.

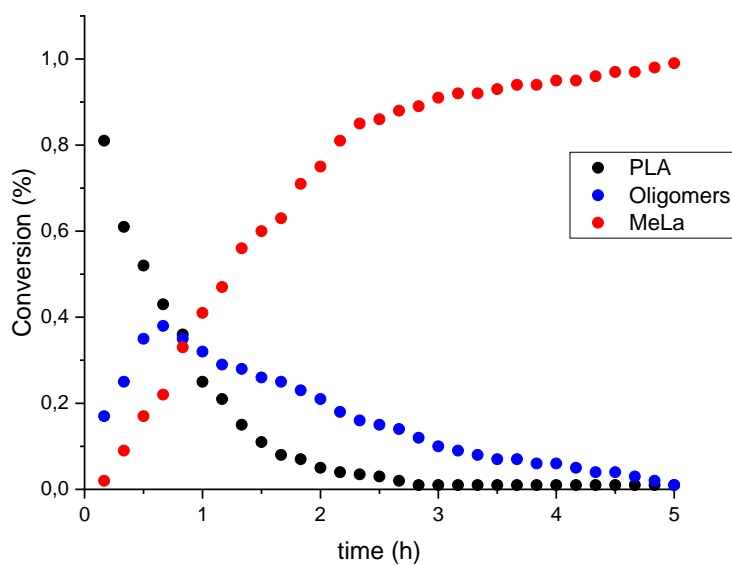

**Figure S21.** Kinetic profile for degradation of a poly (rac-LA) sample ( $[\text{PLA}]_0 = 0.44 \text{ M}$ ; [polyester linkages] $_0$ /[Zn] $_0 = 60$ ;  $\text{CH}_2\text{Cl}_2$  (0.45 mL) as solvent; MeOH 0.05mL).

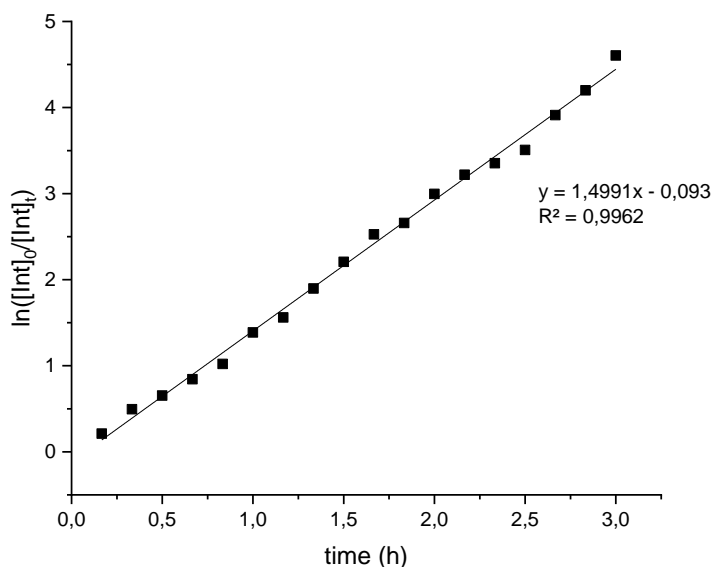

**Figure S22.** Pseudofirst-order kinetic plot for degradation of poly(rac) lactide ([PLA]<sub>0</sub> = 0.44 M; [polyester linkages]<sub>0</sub>/[Zn]<sub>0</sub> = 60; CH<sub>2</sub>Cl<sub>2</sub> (0.45 mL) as solvent; MeOH 0.05mL). Pseudofirst-order rate is = 1.50 h<sup>-1</sup> at 25°C (R<sup>2</sup> = 0.9962).

### General procedure for the depolymerization of polylactide solvent free

The depolymerization reaction was carried out under an inert atmosphere. In a Braun Labmaster glovebox, a magnetically stirred reactor vessel (10 mL) was charged with polylactide. In a vial (4mL) the metal-complex was dissolved in MeOH or EtOH and added to the polymer. The reaction mixture was stirred at room temperature. At desired times, small aliquots of the reaction mixture were sampled, dissolved in CDCl<sub>3</sub> or C<sub>6</sub>D<sub>6</sub> and analyzed by <sup>1</sup>H NMR spectroscopy. At the end of the depolymerization the reaction was stopped with CH<sub>2</sub>Cl<sub>2</sub> and dried under vacuum.

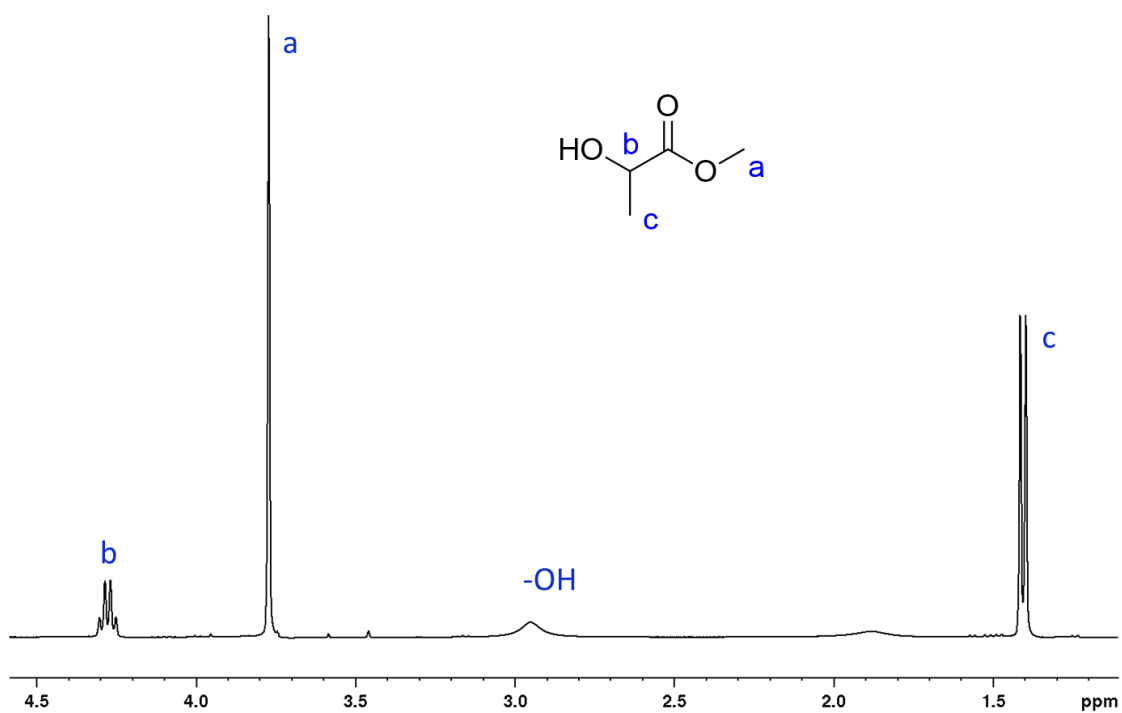

**Figure S23.** <sup>1</sup>H NMR spectrum (400 MHz, CDCl<sub>3</sub>, 298 K) of methyl-lactide (Me-La).

<sup>1</sup>H NMR (400 MHz, CDCl<sub>3</sub>, 298 K): δ 4.27 (q, J = 6.7 Hz, 1H, H<sub>b</sub>), 3.77 (s, 3H, H<sub>a</sub>), 2.95 (br, 1H, -OH), 1.40 (d, J = 6.8 Hz, 3H, H<sub>c</sub>).

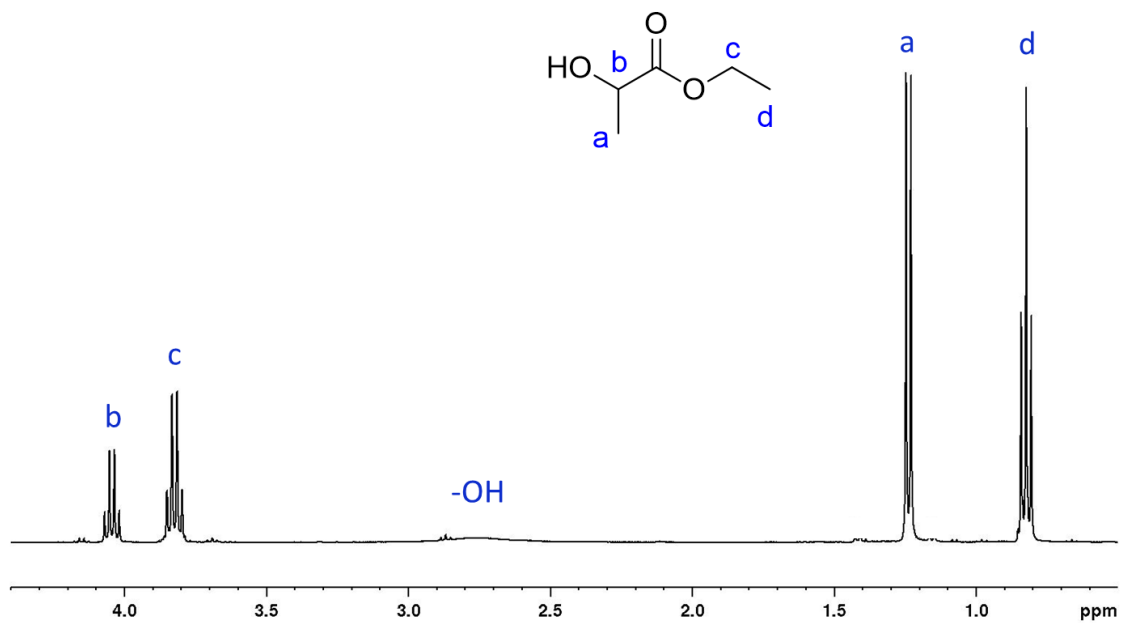

**Figure S24.** <sup>1</sup>H NMR spectrum (400 MHz, C<sub>6</sub>D<sub>6</sub>, 298 K) of ethyl-lactide (Et-La).

<sup>1</sup>H NMR (400 MHz, C<sub>6</sub>D<sub>6</sub>, 298 K):  $\delta$  4.04 (q, J = 6.9 Hz, 1H, H<sub>b</sub>), 3.82 (q, J = 7.2 Hz, 2H, H<sub>c</sub>), 2.76 (br, 1H, -OH), 1.23 (d, J = 6.9 Hz, 3H, H<sub>a</sub>), 0.82 (t, J = 7.1 Hz, 3H, H<sub>d</sub>).

**Table S3.** Methanolysis of PLAs performed in THF solution.<sup>a</sup>

| Run            | Sample       | Mn <sup>b</sup><br>(KDa) | Time<br>(h) | <sup>d</sup> XInt | <sup>c</sup> Sme-La | <sup>c</sup> YMe-La |
|----------------|--------------|--------------------------|-------------|-------------------|---------------------|---------------------|
| 1              | P(L-LA)      | 30                       | 1           | 100               | 61                  | 61                  |
|                |              |                          | 1.5         | 100               | 100                 | 100                 |
| 2              | P(L-LA)      | 48                       | 1           | 100               | 74                  | 74                  |
|                |              |                          | 1.5         | 100               | 100                 | 100                 |
| 3              | P(L-LA)      | 92                       | 1           | 100               | 77                  | 77                  |
|                |              |                          | 1.5         | 100               | 100                 | 100                 |
| 4              | P(L-LA)      | 14                       | 0.5         | 94                | 74                  | 70                  |
|                |              |                          | 1           | 97                | 95                  | 92                  |
| 5              | P(D,L-LA)    | 13                       | 0.5         | 55                | 27                  | 15                  |
|                |              |                          | 1           | 55                | 48                  | 27                  |
| 6              | P(D,L-LA)    | 44                       | 1           | 75                | 69                  | 52                  |
|                |              |                          | 2           | 88                | 89                  | 78                  |
| 7 <sup>d</sup> | P(L-LA)      | 30                       | 2           | 89                | 38                  | 34                  |
|                |              |                          | 4.5         | 97                | 61                  | 60                  |
|                |              |                          | 24          | 100               | 100                 | 100                 |
| 8 <sup>d</sup> | PLA cup      | 58                       | 2           | 100               | 47                  | 47                  |
|                |              |                          | 4.5         | 100               | 100                 | 100                 |
| 9 <sup>d</sup> | PLA filament | 20                       | 2           | 84                | 26                  | 22                  |
|                |              |                          | 4.5         | 100               | 62                  | 62                  |

<sup>a</sup>All reactions were carried out by using 5  $\mu$ mol of Zn catalyst (0.6 mol % relative to ester linkages) in 1.8 mL of THF, with 0.2 mL of MeOH <sup>b</sup>  $M_n$  = the experimental (GPC) values of the recorded molecular weight of the polymer. <sup>c</sup>Determined by <sup>1</sup>H NMR; <sup>d</sup>reaction performed in air.
